# Supplementary material for: Desenvolvimento de unidades didáticas na formação inicial e continuada de professores para as séries iniciais do ensino fundamental
Source: JCI journal article supplement (doi:10.1172/jci.insight.150483), 2006-01-01
Supplement: sd1 [file 1]

You are being redirected.
