# Supplementary material for: Desenvolvimento de unidades didáticas na formação inicial e continuada de professores para as séries iniciais do ensino fundamental
Source: JCI journal article supplement (doi:10.1172/jci.insight.150483), 2006-01-01
Supplement: sd1 [file 1]

**Title: *TNFRSF13B* genotypes control immune-mediated pathology by regulating the functions of innate B cells**

**Authors:** Mayara Garcia de Mattos Barbosa<sup>1</sup>, Adam R. Lefferts<sup>1</sup>, Daniel Huynh<sup>1</sup>, Hui Liu<sup>1</sup>, Yu Zhang<sup>1</sup>, Beverly Fu<sup>1</sup>, Jenna Barnes<sup>2</sup>, Milagros Samaniego<sup>3</sup>, Richard J. Bram<sup>4</sup>, Raif S. Geha<sup>5</sup>, Ariella Shikanov<sup>6</sup>, Eline T. Luning Prak<sup>7</sup>, Evan Farkash<sup>2</sup>, Jeffrey L. Platt<sup>1,8,\*</sup>, Marilia Cascalho<sup>1,8,\*</sup>

<sup>1</sup>Department of Surgery, University of Michigan, Ann Arbor, MI, 48109, USA

<sup>2</sup>Department of Pathology, University of Michigan, Ann Arbor, MI, 48109, USA

<sup>3</sup>Department of Medicine, University of Michigan, Ann Arbor, MI, 48109, USA

<sup>4</sup>Department of Pediatric and Adolescent Medicine and Department of Immunology; Mayo Foundation; Rochester, MN, 55905, USA

<sup>5</sup>Division of Immunology, Boston Children's Hospital and Department of Pediatrics; Harvard Medical School; Boston, MA, 02115, USA

<sup>6</sup>Department of Biomedical Engineering; University of Michigan; Ann Arbor, MI, 48109, USA

<sup>7</sup>Department of Pathology and Laboratory Medicine; Perelman School of Medicine; University of Pennsylvania; Philadelphia, PA, 19104, USA

<sup>8</sup>Department of Microbiology and Immunology; University of Michigan; Ann Arbor, MI, 48109, USA

Supplemental data and figures:

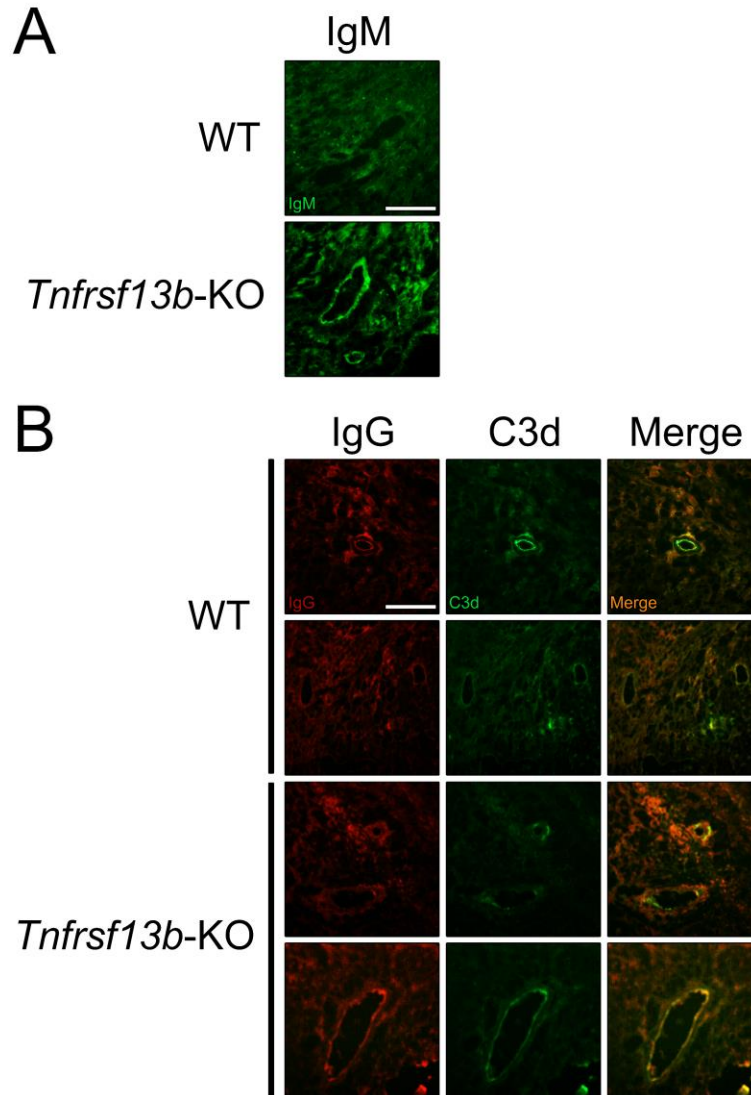

**Figure S1. Anti-IgM, IgG and C3d immunostainings in transplanted hearts 14 days after transplantation.** Hearts from CB6F1 mice (C57BL/6-BALB/c F1, H-2<sup>b/d</sup> haplotype) were transplanted heterotopically into the abdomen of C57BL/6 (H-2<sup>b/b</sup> haplotype) WT and *Tnfrsf13b*-KO. Deposition of IgM, IgG and C3d was evaluated by immunofluorescence. **(A)** Anti-IgM immunostaining of sections obtained from cardiac allografts excised at day 14. Images are representative of a mouse of each group. **(B)** Anti-IgG and anti-C3d immunostainings of sections obtained from cardiac allografts at rejection. Images are representative of two mice of each group. See also Figure 1. Bars: 40  $\mu$ m.

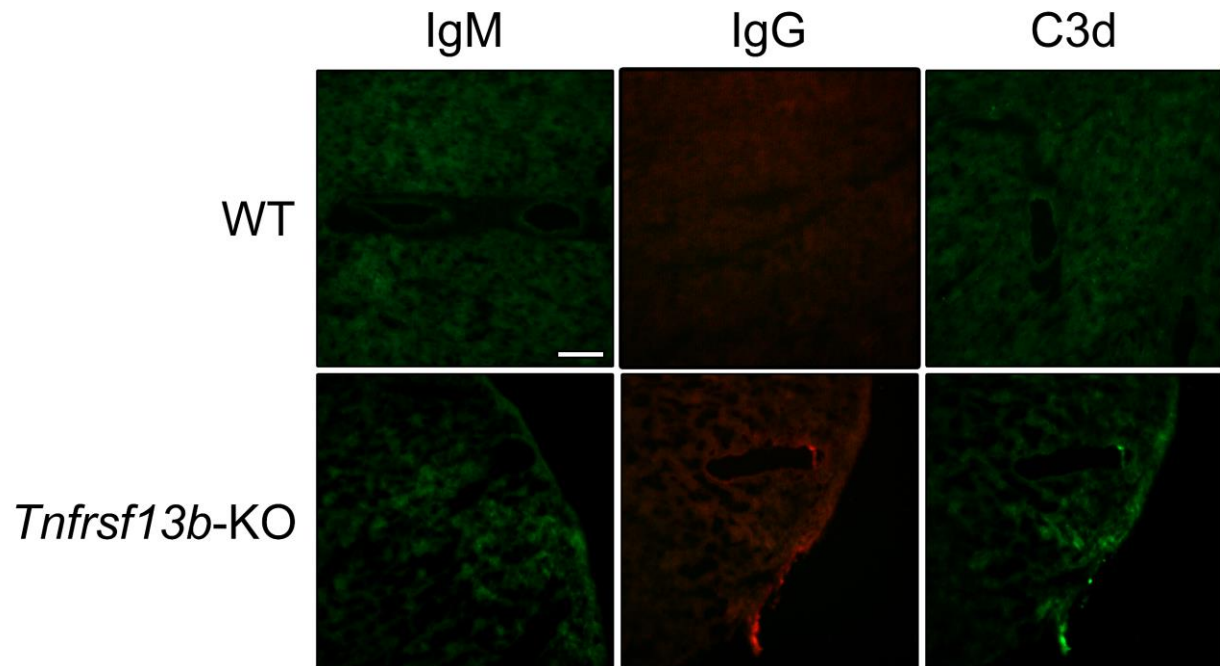

**Figure S2. Anti-IgM, IgG and C3d immunostainings of sections of native hearts obtained at rejection of cardiac allografts.** Hearts from CB6F1 mice (C57BL/6-BALB/c F1, H-2<sup>b/d</sup> haplotype) were transplanted heterotopically into the abdomen of C57BL/6 (H-2<sup>b/b</sup> haplotype) WT and *Tnfrsf13b*-KO. Both transplanted and native hearts were retrieved at rejection. Deposition of IgM, IgG and C3d into the native heart was evaluated by immunofluorescence. Images are representative of a mouse of each group. Bar: 40  $\mu$ m.

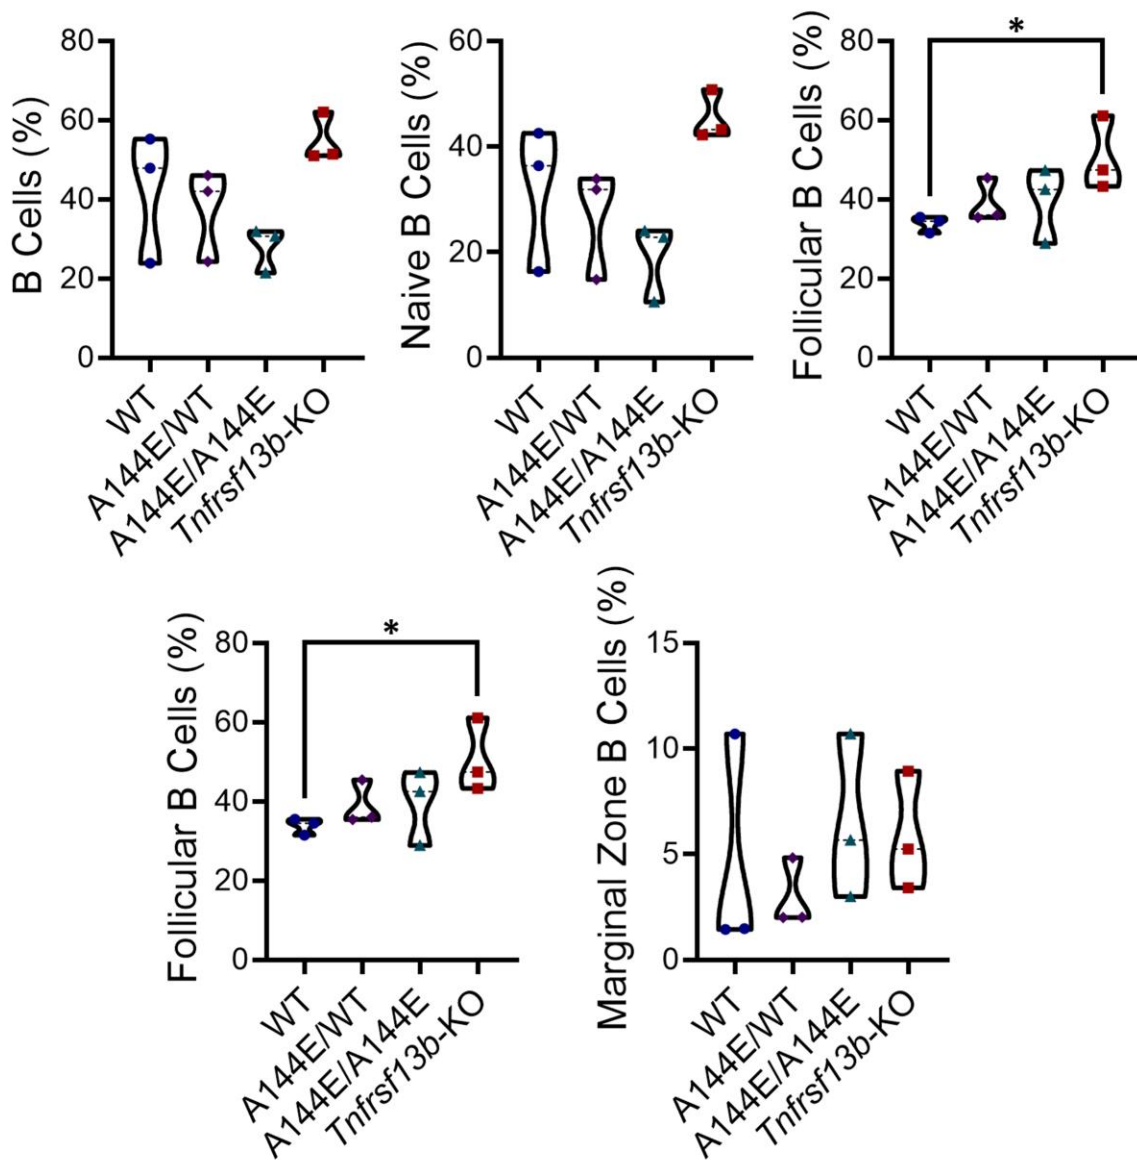

**Figure S3. Splenic B cell populations in *Tnfrsf13b*-mutant mice.** Spleens from naïve mice with different *Tnfrsf13b* genotypes were harvested. Splenic percentages of live lymphocytes with phenotypes of B cells (CD19<sup>+</sup>), naive B cells (CD19<sup>+</sup> IgD<sup>+</sup>) and percentages of CD19<sup>+</sup> B cells that were marginal zone (CD19<sup>+</sup> CD21<sup>high</sup> CD23<sup>-</sup>), follicular (CD19<sup>+</sup> CD21<sup>+</sup> CD23<sup>+</sup>) and germinal center (CD19<sup>+</sup> CD95<sup>+</sup> GL7<sup>+</sup>) B cells in the spleen. Graphs are representative of Mean ± SEM of 3 naïve mice per group. Mann-Whitney test: \* p≤0.05 in relation to the WT control.

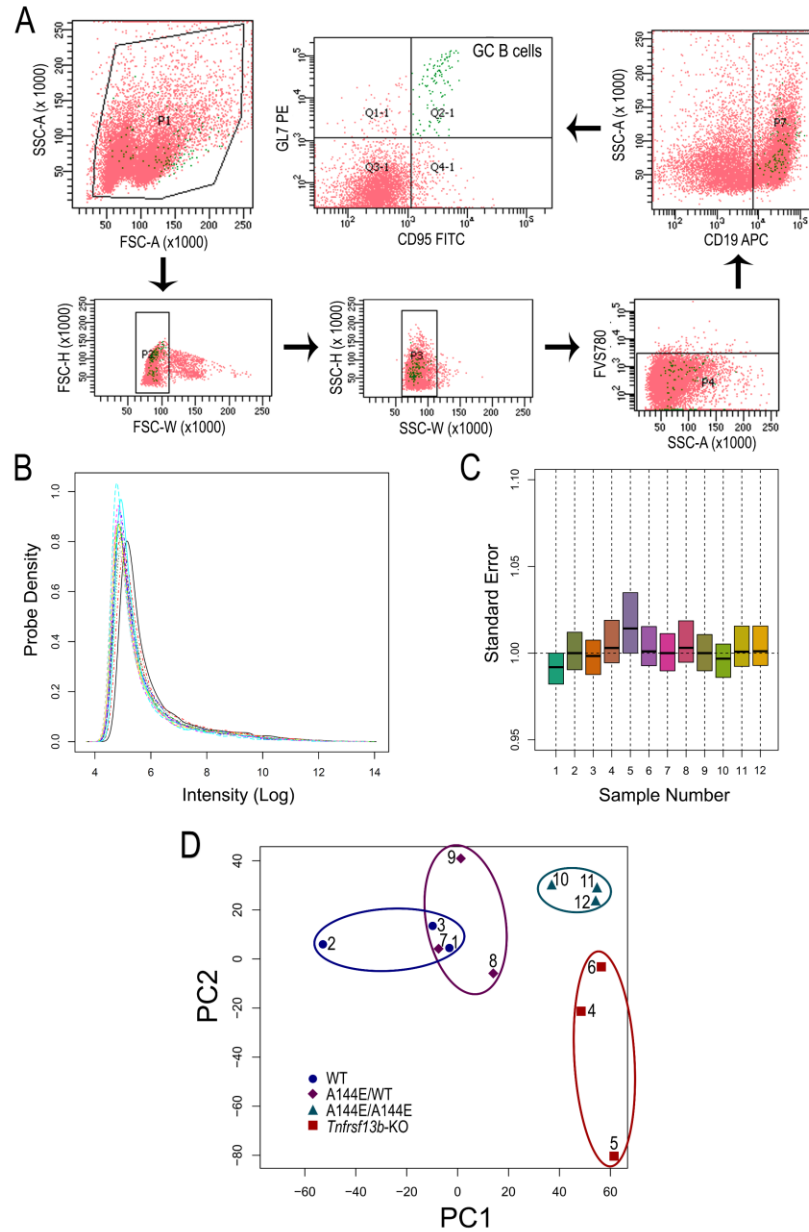

**Figure S4. Germinal center B cells sorting and microarray quality analysis.** Mice were immunized by intraperitoneal injection with  $5 \times 10^7$  allogenic splenocytes and thymocytes. Spleens were collected after 10 days, germinal center (GC) B cells were sorted, RNA was extracted, and gene expression was analyzed by microarray. **(A)** Singlet viable lymphocytes that were CD19<sup>+</sup> (B cells) were further analyzed for the expression of GL7 and FAS (CD95). B cells with a GC phenotype (CD19<sup>+</sup> CD95<sup>+</sup> GL7<sup>+</sup>) were sorted (green) for RNA microarray analysis. **(B)** Probe densities in each microarray chip analyzed ( $n = 3$ ). **(C)** Box plot shows the standard errors for each array calculated after fitting a probe-level model. **(D)** Distribution of analyzed samples in the first two principal components, responsible for 31% of the variation in the principal component analysis. Colored ellipses represent clustered samples by genotype. Sample numbers: 1-3 WT, 4-6 *Tnfrsf13b*-KO, 7-9 A144E/WT, 10-12 A144E/A144E.

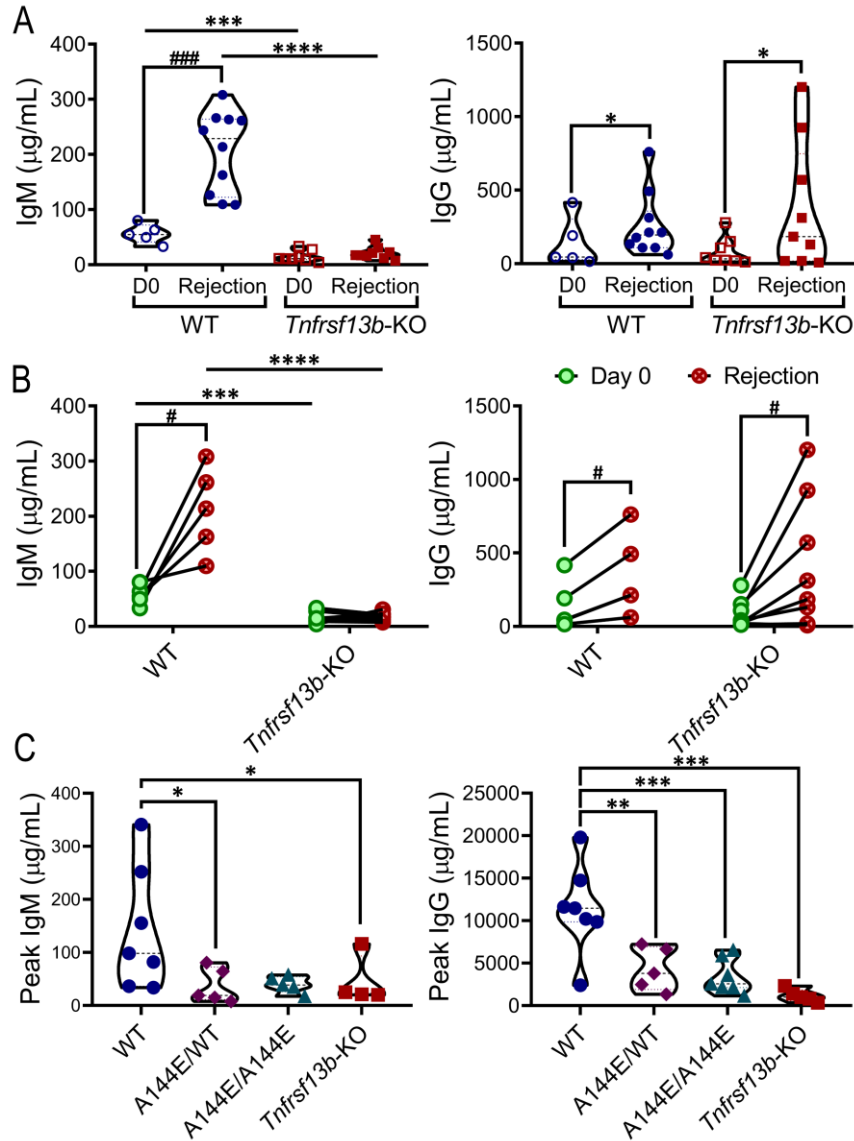

**Figure S5. *Tnfrsf13b* deficiency evokes decreased IgM and increased IgG responses to allografts and allo-immunization.** (A and B) Hearts from CB6F1 mice (C57BL/6-BALB/c F1, H-2<sup>b/d</sup> haplotype) were transplanted heterotopically into the abdomen of C57BL/6 (H-2<sup>b/b</sup> haplotype) WT and *Tnfrsf13b*-KO mice and sera of recipient mice were collected at time of transplant and at rejection. (A) Graphs represent the Mean  $\pm$  SEM of concentrations of total IgM and IgG before transplantation (Day 0) and at rejection of 5-7 mice per group. (B) Paired analysis of immunoglobulin concentrations before transplantation (Day 0, green) and at rejection (red). (C) Mice were immunized via intraperitoneal injection with  $5 \times 10^7$  BALB/c splenocytes and thymocytes, blood was collected weekly for 21 days. The concentrations of total IgM and IgG at the peak of the response post-immunization with allogeneic cells. Graphs are representative of Mean  $\pm$  SEM of 5-7 mice per group. Unpaired (A, B), paired T test (B), Mann-Whitney test (B, C), One-Way ANOVA with Dunnett's multiple comparison test or Kruskal-Wallis with Dunn's multiple comparison test (C): \*  $p \leq 0.05$ ; \*\*  $p \leq 0.01$ ; \*\*\*  $p \leq 0.001$ ; \*\*\*\*  $p \leq 0.0001$  in relation to WT control; #  $p \leq 0.05$ ; ###  $p \leq 0.001$  in relation to day 0 (D0).

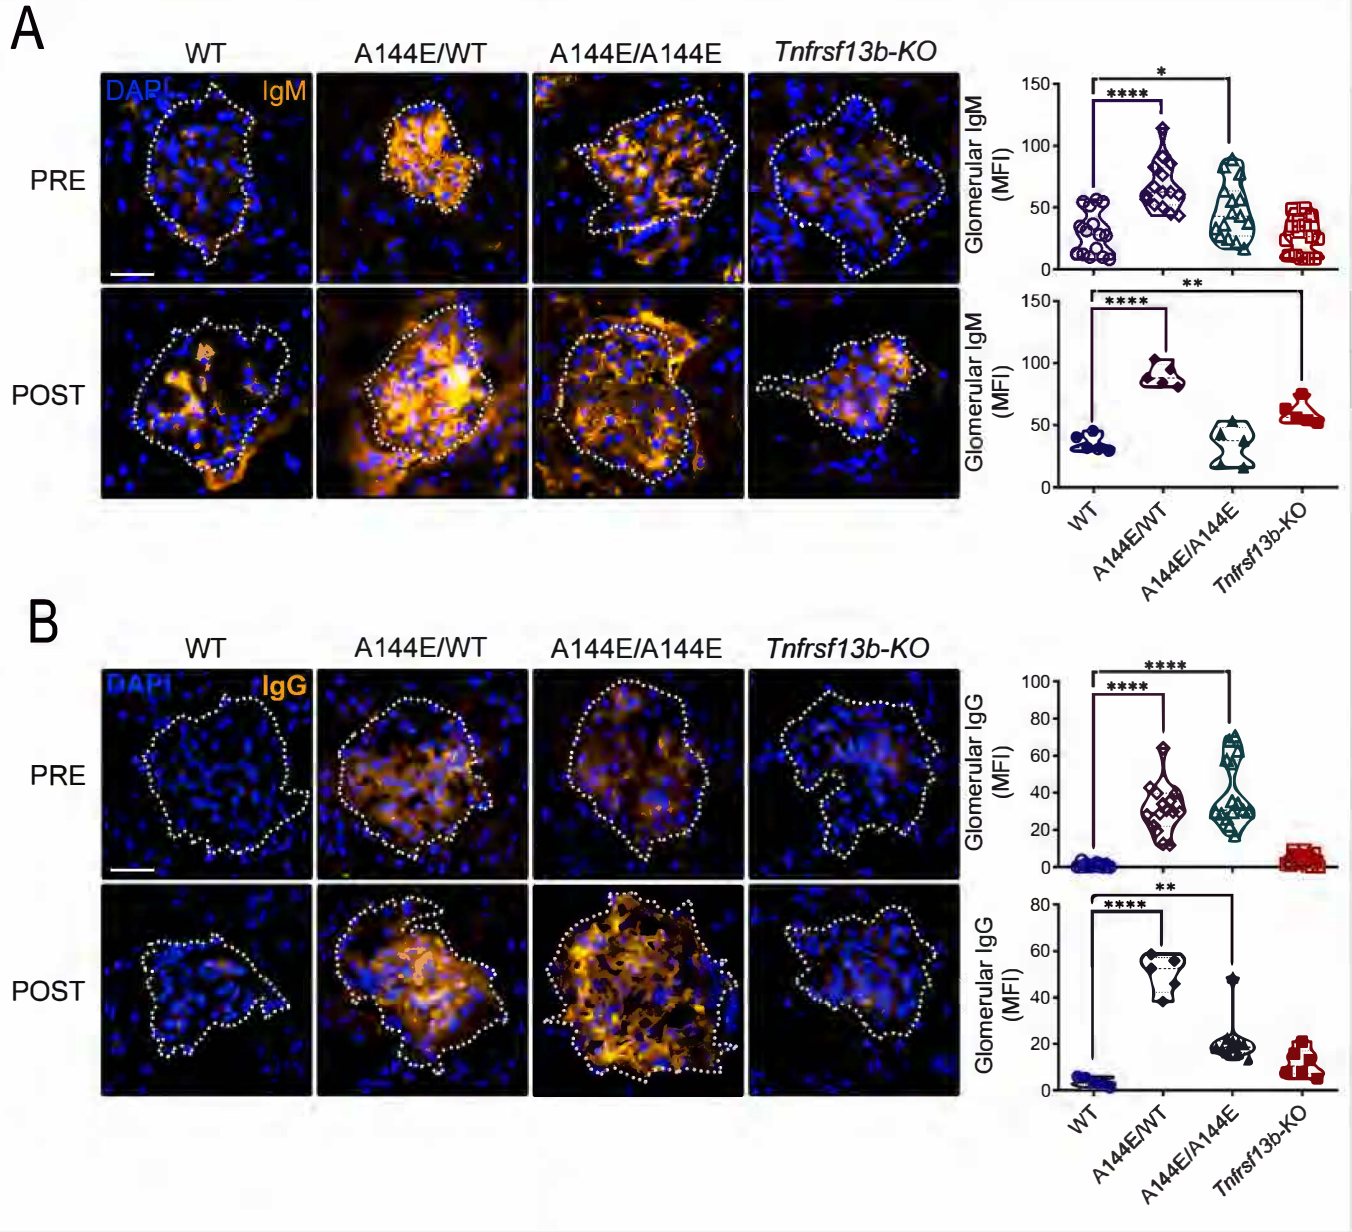

**Figure S6. *Tnfrsf13b* protects native kidneys from immune and inflammatory injury.** (A and B) Native kidneys were harvested from naïve mice (pre) or mice immunized via intraperitoneal injection with  $5 \times 10^7$  BALB/c splenocytes and thymocytes (post). Glomerular IgM (A) and IgG (B) deposits were examined with anti-mouse IgM or IgG immunostaining of frozen native kidney sections pre- or 8 days post-allogeneic stimulation. Bars = 25  $\mu$ m. Graphs show Mean  $\pm$  SEM calculated from analysis of 5-7 fields with 3 or more glomeruli per mouse per group. Open shapes represent data from naïve mice (pre) and filled shapes represent data of mice 8 days of post-immunization (post). One-Way ANOVA with Dunnett's multiple comparison test or Kruskal-Wallis with Dunn's multiple comparison test: \*  $p \leq 0.05$ ; \*\*  $p \leq 0.01$ ; \*\*\*\*  $p \leq 0.0001$  in relation to WT control.

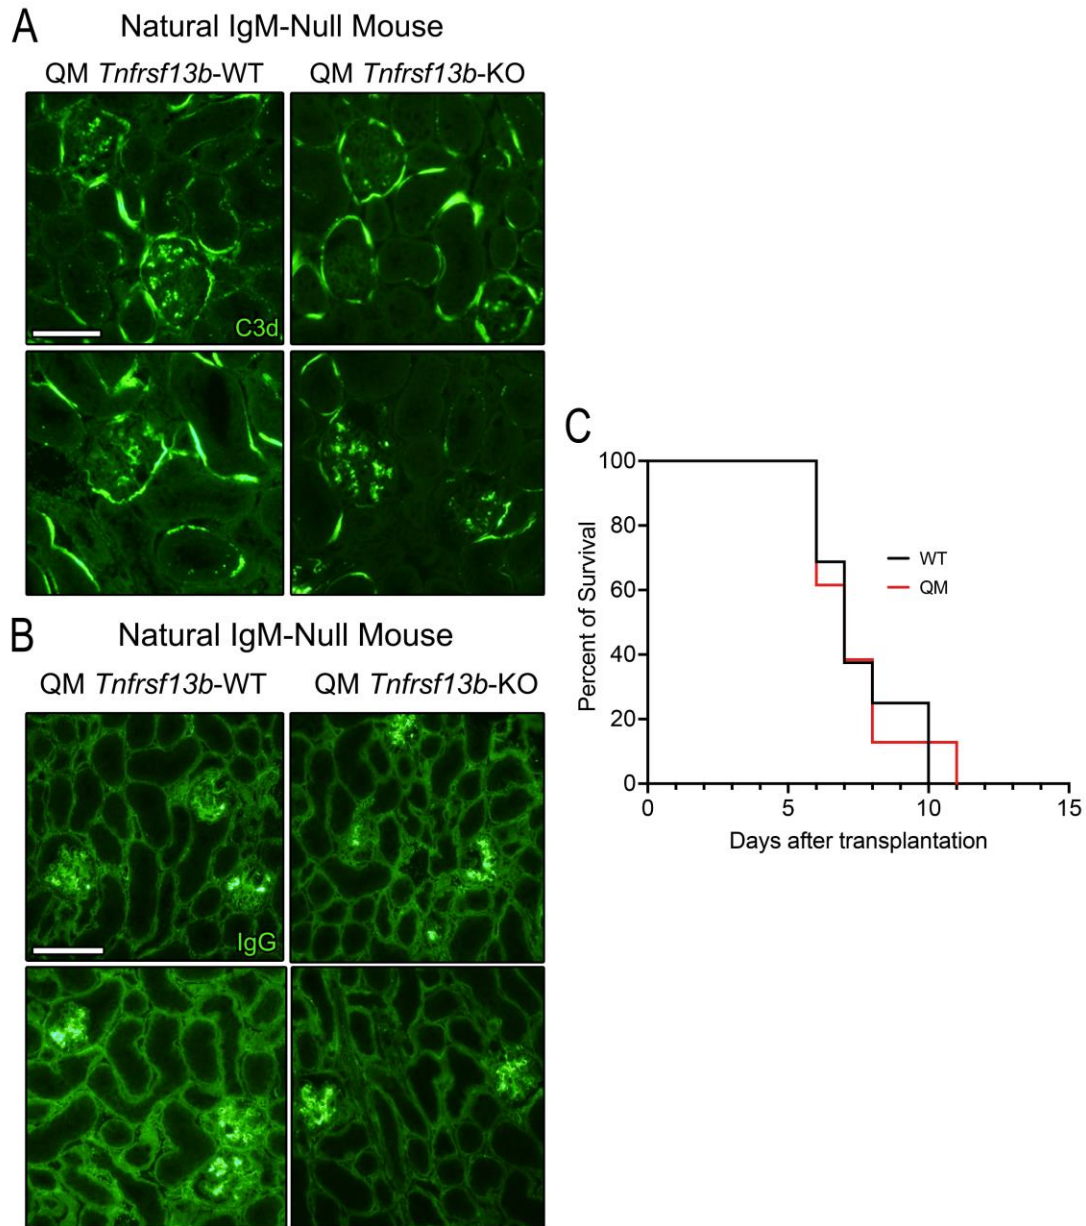

**Figure S7. C3d and IgG deposition in native kidneys of natural antibody-deficient mice.** Native kidneys were harvested from naive Quasi-Monoclonal (QM) mice *Tnfrsf13b* proficient or deficient. Quasi-Monoclonal mice produce only 4-hydroxy-3-nitrophenyl-acetyl (NP)-specific IgM and lack natural IgM. Glomerular C3d deposits (**A**) or IgG (**B**) were identified with anti-mouse C3d or goat anti-mouse IgG on frozen sections obtained from native kidneys. Figures show typical sections obtained from two distinct *Tnfrsf13b* proficient (left) or deficient (right) Quasi-Monoclonal mice, representative from stainings in 7 different mice of each genetic background. Bar: 25  $\mu$ m. (**C**) Hearts (transplanted heterotopically into the abdomen) from BALB/c mice H-2<sup>d/d</sup> haplotype) were transplanted into C57BL/6 (H-2<sup>b/b</sup> haplotype) WT and QM mice and allograft survival was evaluated daily until rejection. Graph depicts the survival curves showing overlapping rejection kinetics.



**Table S1. Predicted impact of *TNFRSF13B* mutations on protein function.** Impact of *TNFRSF13B* missense mutations on protein structure and function, according to SIFT, PolyPhen-2, CADD, REVEL, MetaLR and MutationAssessor prediction tools and the ClinVar database.

| Exon   | Missense Mutation | Variant ID                                                         |                              | SIFT  |             | PolyPhen-2 |                   | CADD | REVEL         |       | MetaLR                 |       | MutationAssessor |       | ClinVar |                                                                                                                                                 |
|--------|-------------------|--------------------------------------------------------------------|------------------------------|-------|-------------|------------|-------------------|------|---------------|-------|------------------------|-------|------------------|-------|---------|-------------------------------------------------------------------------------------------------------------------------------------------------|
|        |                   | GnomAD Browser                                                     | Ensembl                      |       |             |            |                   |      |               |       |                        |       |                  |       |         |                                                                                                                                                 |
| Exon 3 | C104R             | <a href="#">17-16852187-A-G</a>                                    | <a href="#">rs34557412</a>   | 0.000 | deleterious | 0.999      | probably damaging | 25   | likely benign | 0.919 | likely disease causing | 0.861 | damaging         | 0.828 | medium  | conflicting interpretations of pathogenicity, risk factor: likely benign (2); likely pathogenic (2); pathogenic (2); uncertain significance (4) |
|        | A173T             | N.A.                                                               | <a href="#">rs369937497</a>  | 0.160 | tolerated   | 0.030      | benign            | 1    | likely benign | 0.419 | likely benign          | 0.648 | damaging         | 0.609 | medium  | N.A.                                                                                                                                            |
|        | A181E             | <a href="#">17-16843729-G-T</a>                                    | <a href="#">rs72553883</a>   | 0.000 | deleterious | 0.395      | benign            | 10   | likely benign | 0.607 | likely disease causing | 0.600 | damaging         | 0.528 | medium  | conflicting interpretations of pathogenicity: likely benign (1); likely pathogenic (2); pathogenic (2); uncertain significance (1)              |
| Exon 4 | K188del           | <a href="#">17-16843705-CTCT-C</a>                                 | <a href="#">rs376630110</a>  | -     | -           | -          | -                 | -    | -             | -     | -                      | -     | -                | -     | -       | benign                                                                                                                                          |
|        | K188M             | <a href="#">17-16843708-T-A</a>                                    | <a href="#">rs74811083</a>   | 0.000 | deleterious | 0.360      | benign            | 15   | likely benign | 0.399 | likely benign          | 0.323 | tolerated        | 0.169 | neutral | benign/likely benign                                                                                                                            |
|        | R189M             | <a href="#">17-16843705-C-A</a>                                    | <a href="#">rs199777698</a>  | 0.000 | deleterious | 0.520      | possibly damaging | 16   | likely benign | 0.603 | likely disease causing | 0.783 | damaging         | 0.528 | medium  | uncertain significance                                                                                                                          |
|        | G190R             | <a href="#">17-16843703-C-G</a><br><a href="#">17-16843703-C-T</a> | <a href="#">rs150101848</a>  | 0.010 | deleterious | 0.198      | benign            | 15   | likely benign | 0.397 | likely benign          | 0.845 | damaging         | 0.609 | medium  | uncertain significance                                                                                                                          |
|        | S209F             | N.A.                                                               | <a href="#">rs1314475404</a> | 0.030 | deleterious | 0.019      | benign            | 16   | likely benign | 0.326 | likely benign          | 0.692 | damaging         | 0.581 | medium  | N.A.                                                                                                                                            |
| Exon 5 | P251L             | <a href="#">17-16842991-G-A</a>                                    | <a href="#">rs34562254</a>   | 0.100 | tolerated   | 0.284      | benign            | 12   | likely benign | 0.261 | likely benign          | 0.000 | tolerated        | 0.261 | low     | benign                                                                                                                                          |

**Abbreviations:** SIFT, Sorting Intolerant From Tolerant; PolyPhen-2, Polymorphism Phenotyping v2; CADD, Combined Annotation-Dependent Depletion; REVEL, Rare Exome Variant Ensemble Learner; N.A., Not available.

**Table S2. Top 500 germinal center B cell genes differentially expressed between wild type and *Tnfrsf13b*-mutant mice 10 days post-allogenic stimulation.**
